# Supplementary material for: P-body proteins regulate transcriptional rewiring to promote DNA replication stress resistance
Source: PubMed Central journal article supplement (PMC5601920; doi:10.1038/s41467-017-00632-2), 2017-09-15
Supplement: 41467_2017_632_MOESM8_ESM.pdf [file 41467_2017_632_MOESM8_ESM.pdf]

### **Description of Supplementary Files**

File Name: Supplementary Information

Description: Supplementary Figures, Supplementary Tables and Supplementary References

File Name: Supplementary Data 1

Description: RNAseq data related to Figure 1

File Name: Supplementary Data 2

Description: GO term enrichment data related to Figure 1

File Name: Supplementary Data 3

Description: HU sensitivity suppressor screen data related to Figure 2

File Name: Supplementary Data 4

Description: RNAseq data related to Figure 6

File Name: Supplementary Data 5

Description: Fitness data related to Figure 6.

File Name: Supplementary Software 1

Description: R scripts and Cellprofiler pipelines used for the analysis of the data generated in this manuscript

File Name: Peer Review File

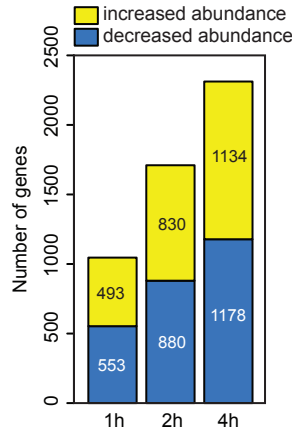

**Supplementary Fig. 1. The number of genes induced or repressed upon HU exposure in WT cells.** The number of differentially expressed genes was determined using the Tuxedo protocol.

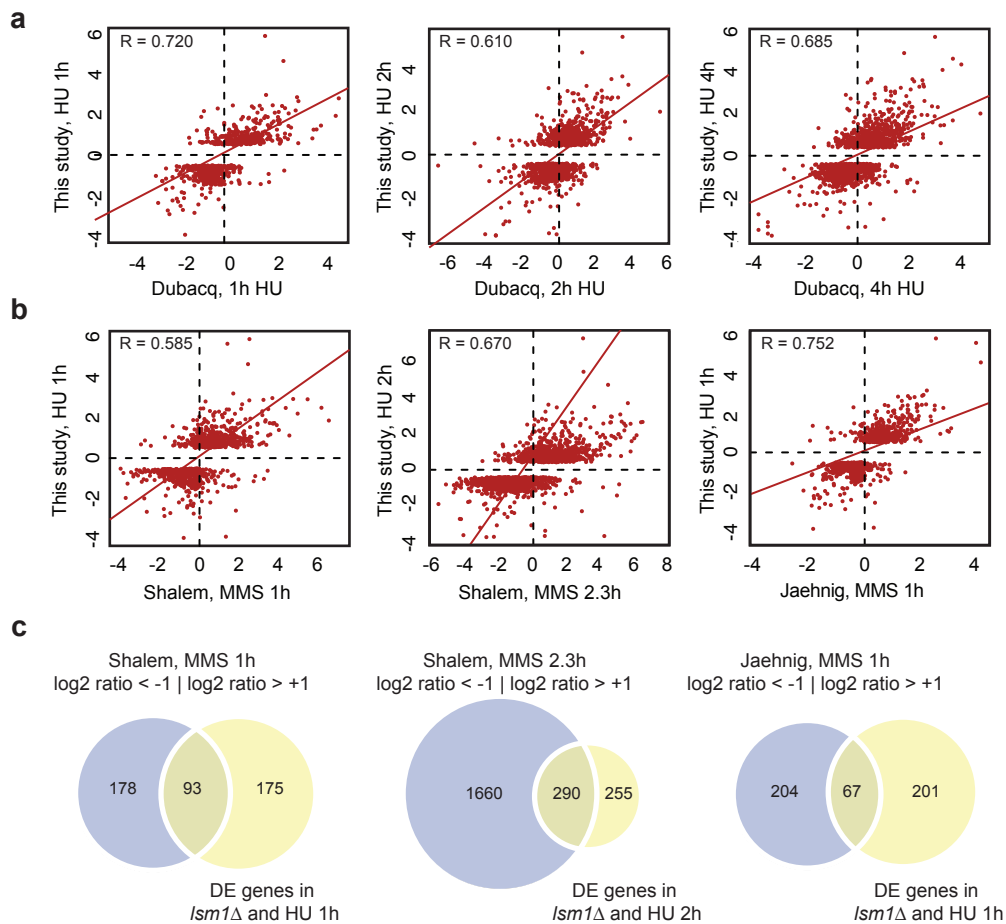

**Supplementary Fig. 2. Lsm1 regulates RNA abundance of HU-responsive genes as well as more general DNA replication stress genes.** (a) Correlation between the expression ratios for the differentially expressed genes identified in WT cells in this study upon HU exposure and the study of Dubacq et al. (2006) at 1, 2 and 4 hours in HU. (b) Correlation between the expression ratios for the differentially expressed genes identified in WT cells in this study upon HU exposure and WT cells in MMS in the study of Shalem et al. (2008) or Jaehnig et al. (2013). (c) Venn Diagram representing the overlap between the genes showing  $\log_2$  expression ratios inferior to -1 or superior to +1 in the study of Shalem et al. (2008) or Jaehnig et al. (2013) and the genes showing differential expression upon HU exposure and in *lsm1Δ* cells in this study. DE: Differentially Expressed

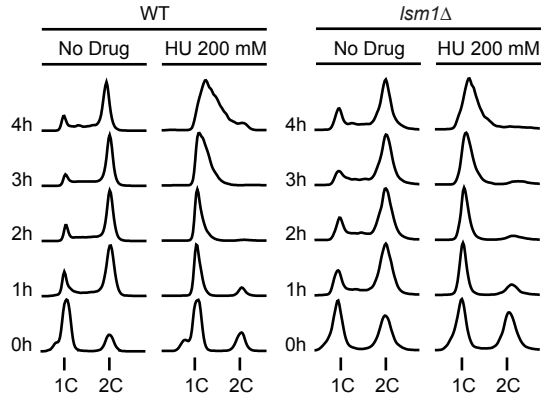

**Supplementary Fig. 3. Cell-cycle progression of the WT and *Ism1* $\Delta$  strain under normal growth or in presence of HU.** Flow cytometry histograms of DNA contents in wild type and *Ism1* $\Delta$  cells. Cells were arrested in G1 and then released into S phase in the absence or presence of HU. The positions of cells with 1C and 2C DNA contents are indicated.

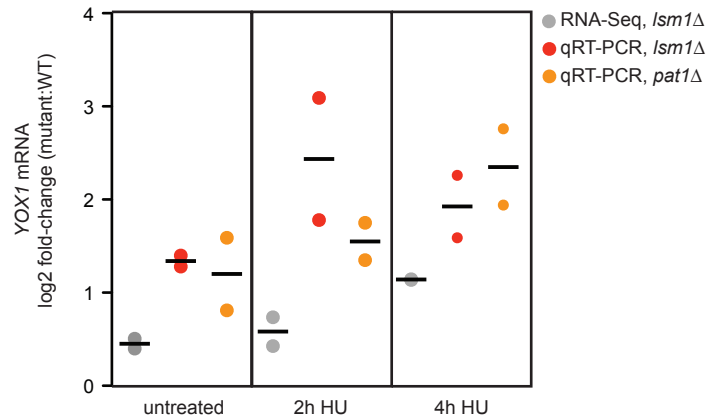

**Supplementary Fig. 4. *YOX1* RNA abundance increases in *Ism1* $\Delta$  and *pat1* $\Delta$  cells.** log<sub>2</sub> expression ratios comparing *YOX1* mRNA levels in WT and *Ism1* $\Delta$  cells obtained by RNA-Seq (grey) or qRT-PCR (red) or log<sub>2</sub> expression ratios comparing *YOX1* mRNA levels in WT and *pat1* $\Delta$  cells obtained by qRT-PCR (orange). The means and two biological replicates are shown. Each qRT-PCR biological replicate included at least 2 technical replicates.

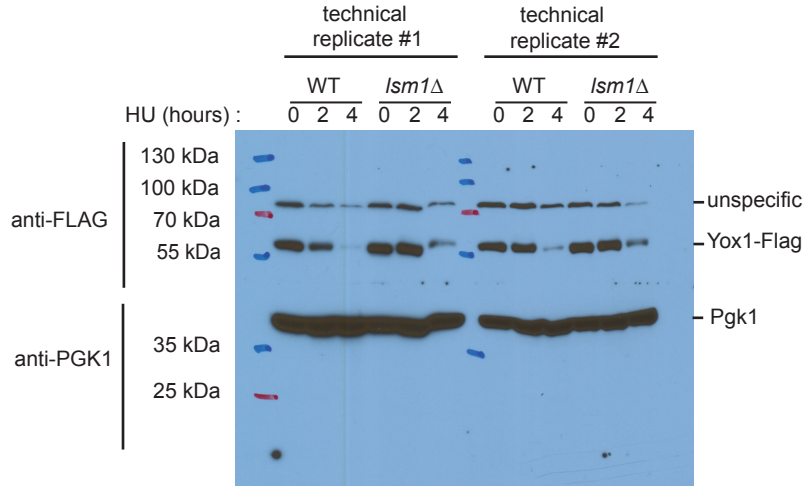

**Supplementary Fig. 5. Full immuno-blot image related to Fig. 5b.** Yox1-FLAG protein abundance was probed using anti-FLAG antibody. Pgk1 was used as loading control.

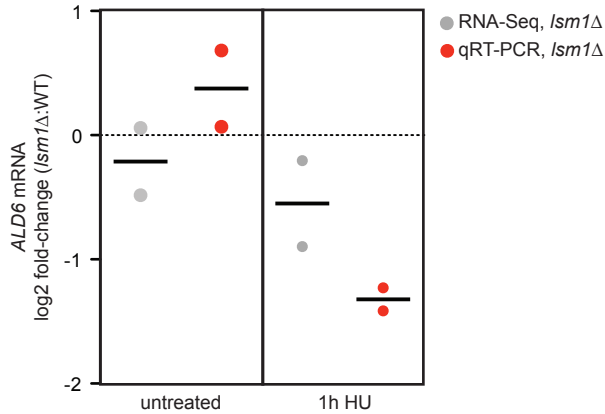

**Supplementary Fig. 6. ALD6 mRNA abundance decreases in *Ism1Δ* cells.** log<sub>2</sub> expression ratios comparing *ALD6* mRNA levels in WT and *Ism1Δ* cells obtained by RNA-Seq (grey) or qRT-PCR (red). The means and two biological replicates are shown. Each qRT-PCR biological replicate included at least 2 technical replicates.

**Supplementary Table 1. Comparison of RNA-seq results obtained with Cuffdiff, EBSeq or edgeR**

| method   | condition | down-regulated genes          |                           | up-regulated genes            |                           |
|----------|-----------|-------------------------------|---------------------------|-------------------------------|---------------------------|
|          |           | number of DE genes identified | overlap with cuffdiff (%) | number of DE genes identified | overlap with cuffdiff (%) |
| cuffdiff | untreated | 258                           | NA                        | 333                           | NA                        |
| EBSeq    |           | 564                           | 198 (35%)                 | 521                           | 208 (40%)                 |
| edgeR    |           | 703                           | 236 (34%)                 | 800                           | 305 (38%)                 |
| cuffdiff | 1h HU     | 332                           | NA                        | 499                           | NA                        |
| EBSeq    |           | 682                           | 265 (39%)                 | 867                           | 382 (44%)                 |
| edgeR    |           | 762                           | 319 (42%)                 | 911                           | 455 (50%)                 |
| cuffdiff | 2h HU     | 686                           | NA                        | 911                           | NA                        |
| EBSeq    |           | 817                           | 514 (63%)                 | 959                           | 697 (73%)                 |
| edgeR    |           | 1509                          | 666 (44%)                 | 1578                          | 888 (57%)                 |
| cuffdiff | 4h HU     | 1051                          | NA                        | 1203                          | NA                        |
| EBSeq    |           | 1026                          | 793 (77%)                 | 1085                          | 860 (79%)                 |
| edgeR    |           | 1753                          | 1024 (58%)                | 1887                          | 1176 (62%)                |

DE : Differentially Expressed

**Supplementary Table 2. Expression data from cuffdiff, EBSeq and edgeR for the genes identified in Fig. 2**

| condition | gene         | cuffdiff |          |                       | EBSeq   |                                    | edgeR   |          |                       |
|-----------|--------------|----------|----------|-----------------------|---------|------------------------------------|---------|----------|-----------------------|
|           |              | log2 FC  | p-value  | FDR corrected p-value | log2 FC | posterior probability <sup>1</sup> | log2 FC | p-value  | FDR corrected p-value |
| untreated | <i>ACF4</i>  | 0,185    | 3,70E-01 | 6,76E-01              | 0,186   | 1,18E-12                           | 0,190   | 2,09E-01 | 3,99E-01              |
|           | <i>ARL3</i>  | 0,497    | 1,62E-02 | 1,12E-01              | 0,497   | 1,38E-08                           | 0,499   | 8,44E-04 | 6,61E-03              |
|           | <i>HHT1</i>  | 1,010    | 5,00E-05 | 1,63E-03              | 1,011   | 1,00E+00                           | 1,014   | 2,30E-14 | 3,00E-12              |
|           | <i>RRS1</i>  | 0,682    | 1,50E-04 | 3,99E-03              | 0,683   | 1,00E+00                           | 0,686   | 1,26E-08 | 5,08E-07              |
|           | <i>TMA16</i> | 0,941    | 5,00E-05 | 1,63E-03              | 0,942   | 1,00E+00                           | 0,946   | 1,65E-14 | 2,19E-12              |
|           | <i>YOX1</i>  | 0,454    | 1,88E-02 | 1,22E-01              | 0,454   | 1,21E-07                           | 0,458   | 9,92E-04 | 7,47E-03              |
| 1h HU     | <i>ACF4</i>  | 0,336    | 1,33E-01 | 3,57E-01              | 0,336   | 2,68E-12                           | 0,325   | 4,93E-02 | 1,39E-01              |
|           | <i>ARL3</i>  | 0,437    | 4,29E-02 | 1,76E-01              | 0,437   | 1,05E-09                           | 0,426   | 1,04E-02 | 4,34E-02              |
|           | <i>HHT1</i>  | 1,801    | 5,00E-05 | 1,11E-03              | 1,802   | 1,00E+00                           | 1,789   | 5,49E-23 | 1,01E-20              |
|           | <i>RRS1</i>  | 0,386    | 7,17E-02 | 2,46E-01              | 0,387   | 1,78E-01                           | 0,377   | 9,04E-02 | 2,17E-01              |
|           | <i>TMA16</i> | 1,079    | 5,00E-05 | 1,11E-03              | 1,079   | 1,00E+00                           | 1,068   | 1,86E-09 | 7,75E-08              |
|           | <i>YOX1</i>  | 0,958    | 5,00E-05 | 1,11E-03              | 0,956   | 1,00E+00                           | 0,947   | 7,49E-07 | 1,53E-05              |
| 2h HU     | <i>ACF4</i>  | 0,510    | 5,60E-03 | 2,74E-02              | 0,500   | 7,25E-07                           | 0,500   | 2,94E-04 | 1,06E-03              |
|           | <i>ARL3</i>  | 0,645    | 4,50E-04 | 3,60E-03              | 0,635   | 3,07E-01                           | 0,631   | 1,37E-08 | 1,12E-07              |
|           | <i>HHT1</i>  | 1,321    | 5,00E-05 | 5,58E-04              | 1,313   | 1,00E+00                           | 1,309   | 7,11E-40 | 1,24E-37              |
|           | <i>RRS1</i>  | 0,647    | 1,50E-04 | 1,47E-03              | 0,638   | 1,00E+00                           | 0,634   | 7,96E-12 | 1,07E-10              |
|           | <i>TMA16</i> | 1,034    | 5,00E-05 | 5,58E-04              | 1,024   | 1,00E+00                           | 1,021   | 5,04E-25 | 3,22E-23              |
|           | <i>YOX1</i>  | 0,572    | 1,25E-03 | 8,27E-03              | 0,563   | 4,38E-04                           | 0,560   | 1,26E-05 | 6,01E-05              |
| 4h HU     | <i>ACF4</i>  | 0,630    | 1,45E-03 | 6,30E-03              | 0,623   | 1,44E-04                           | 0,631   | 2,10E-06 | 8,16E-06              |
|           | <i>ARL3</i>  | 0,425    | 1,25E-02 | 3,77E-02              | 0,420   | 3,81E-07                           | 0,427   | 2,66E-04 | 7,54E-04              |
|           | <i>HHT1</i>  | 1,356    | 5,00E-05 | 3,47E-04              | 1,351   | 1,00E+00                           | 1,355   | 3,19E-55 | 4,82E-53              |
|           | <i>RRS1</i>  | 0,746    | 5,00E-05 | 3,47E-04              | 0,741   | 1,00E+00                           | 0,745   | 9,25E-17 | 1,19E-15              |
|           | <i>TMA16</i> | 1,233    | 5,00E-05 | 3,47E-04              | 1,226   | 1,00E+00                           | 1,231   | 4,60E-32 | 1,89E-30              |
|           | <i>YOX1</i>  | 1,141    | 5,00E-05 | 3,47E-04              | 1,134   | 1,00E+00                           | 1,139   | 1,64E-23 | 4,00E-22              |

FC : Fold-Change; Red shading indicates statistically supported differential expression

<sup>1</sup> Values superior or equal to 0.95 are considered significant for posterior probability in EBSeq

Supplementary Table 3. YETFASCO scanning results for *ALD6* and *ICS2* promoter regions

| Gene promoter scanned | Transcription factor | Coordinates (relative to START codon) |      | Strand  | % of Max score | Motif            | YETFASCO motif ID |
|-----------------------|----------------------|---------------------------------------|------|---------|----------------|------------------|-------------------|
| <i>ALD6</i>           | Yox1                 | -987                                  | -978 | -       | 76,8           | GTTGATTGGG       | #2196             |
|                       |                      | -855                                  | -846 | -       | 75,4           | GTTAATGGTG       | #2196             |
|                       |                      | -660                                  | -651 | +       | 77             | CTAAATGACT       | #2196             |
|                       |                      | -298                                  | -289 | -       | 81,6           | AGTAATTGGC       | #2196             |
|                       |                      | -296                                  | -289 | +       | 100            | CAATTACT         | #453              |
| <i>ICS2</i>           | Yox1                 | -162                                  | -155 | -       | 97,3           | TAATTACA         | #453              |
|                       |                      | -545                                  | -536 | -       | 76,7           | GTTAATGACT       | #2196             |
|                       |                      | -303                                  | -296 | -       | 76,3           | TAATTAGG         | #453              |
|                       |                      | -302                                  | -295 | -       | 80,6           | ATAATTAG         | #498              |
|                       |                      | -268                                  | -259 | -       | 78,3           | GTTTATTACG       | #2196             |
| <i>ALD6</i>           | Mcm1                 | -823                                  | -816 | -       | 84,2           | TTCGTCAA         | #1369             |
|                       |                      | -384                                  | -375 | +       | 80,2           | CCCCAAACGG       | #2139             |
|                       |                      | -383                                  | -374 | +       | 93,8           | CCCCAAACGGG      | #2139             |
|                       |                      | -344                                  | -329 | -       | 79,9           | CTTCCCAAAGAGGAAA | #1015             |
|                       |                      | -344                                  | -329 | -       | 78,2           | CTTCCCAAAGAGGAAA | #1485             |
|                       |                      | -344                                  | -330 | -       | 86             | TTCCCAAAGAGGAAA  | #1298             |
|                       |                      | -344                                  | -329 | -       | 78,7           | CTTCCCAAAGAGGAAA | #1544             |
|                       |                      | -341                                  | -330 | -       | 86,2           | TTCCCAAAGAGG     | #1543             |
|                       |                      | -341                                  | -332 | -       | 85,1           | CCCAAAGAGG       | #2139             |
| -337                  | -330                 | -                                     | 78,6 | TTCCCAA | #1369          |                  |                   |
| <i>ICS2</i>           | Mcm1                 | -993                                  | -986 | +       | 80,5           | TCCGCAAT         | #1369             |
|                       |                      | -924                                  | -917 | -       | 91,1           | TTCGCAAT         | #1369             |
|                       |                      | -580                                  | -573 | +       | 82,9           | AAAATAGG         | #1368             |
|                       |                      | -304                                  | -297 | -       | 82,9           | AATTAGGT         | #1367             |
|                       |                      | -303                                  | -296 | -       | 85,4           | TAATTAGG         | #1368             |
|                       |                      | -40                                   | -33  | +       | 79,6           | TTCGTTAT         | #1369             |
|                       |                      | -303                                  | -296 | -       | 85,4           | TAATTAGG         | #1368             |
|                       |                      | -40                                   | -33  | +       | 79,6           | TTCGTTAT         | #1369             |

**Supplementary Table 4. Strains used in this study.**

| Lab ID | Strain name                                  | Genotype                                                                                                                                                              | Source     |
|--------|----------------------------------------------|-----------------------------------------------------------------------------------------------------------------------------------------------------------------------|------------|
| BY4741 | WT                                           | <i>MATa leu2Δ0 his3Δ1 ura3Δ0 met15Δ0</i>                                                                                                                              | 1          |
| RLKY6  | <i>lsm1Δ</i>                                 | <i>MATα lsm1Δ::kanMX can1Δ::STE2pr-his5 lyp1Δ leu2Δ0 his3Δ1 ura3Δ0</i>                                                                                                | C. Boone   |
| JTY16  | <i>lsm1Δ</i>                                 | <i>MATa leu2Δ0 his3Δ1 ura3Δ0 met15Δ0</i>                                                                                                                              | 2          |
| RLKY15 | <i>pat1Δ</i>                                 | <i>MATα pat1Δ::natMX can1Δ::STE2pr-his5 lyp1Δ::STE3pr-LEU2</i>                                                                                                        | C. Boone   |
| RLKY24 | WT + pBY011                                  | <i>MATa pBY011[GAL1-10pr-] leu2Δ0 his3Δ1 ura3Δ0 met15Δ0</i>                                                                                                           | this study |
| RLKY27 | WT + pBY011-YOX1                             | <i>MATa pBY011[GAL1-10pr-YOX1] leu2Δ0 his3Δ1 ura3Δ0 met15Δ0</i>                                                                                                       | this study |
| RLKY53 | <i>lsm1Δ</i> + pBY011                        | <i>MATa lsm1Δ::kanMX pBY011[GAL1-10p-] leu2Δ0 his3Δ1 ura3Δ0 met15Δ0</i>                                                                                               | this study |
| RLKY54 | <i>lsm1Δ</i> + pBY011-YOX1                   | <i>MATa lsm1Δ::kanMX pBY011[GAL1-10pr-YOX1] leu2Δ0 his3Δ1 ura3Δ0 met15Δ0</i>                                                                                          | this study |
| RLKY55 | <i>pat1Δ</i> + pBY011                        | <i>MATa pat1Δ::kanMX pBY011[GAL1-10pr-] leu2Δ0 his3Δ1 ura3Δ0 met15Δ0</i>                                                                                              | this study |
| RLKY56 | <i>pat1Δ</i> + pBY011-YOX1                   | <i>MATa pat1Δ::kanMX pBY011[GAL1-10p-YOX1] leu2Δ0 his3Δ1 ura3Δ0 met15Δ0</i>                                                                                           | this study |
| RLKY57 | <i>yox1Δ</i>                                 | <i>MATa yox1Δ::kanMX leu2Δ0 his3Δ1 ura3Δ0 met15Δ0</i>                                                                                                                 | 3          |
| RLKY58 | <i>yhp1Δ</i>                                 | <i>MATa yhp1Δ::kanMX leu2Δ0 his3Δ1 ura3Δ0 met15Δ0</i>                                                                                                                 | 3          |
| RLKY60 | <i>lsm1Δ yox1Δ</i>                           | <i>MATa lsm1Δ::natMX yox1Δ::kanMX can1Δ::STE2pr-his5 lyp1Δ leu2Δ0 his3Δ1 ura3Δ0 lys2Δ0</i>                                                                            | this study |
| RLKY61 | <i>lsm1Δ yhp1Δ</i>                           | <i>MATa lsm1Δ::natMX yhp1Δ::kanMX can1Δ::STE2pr-his5 lyp1Δ leu2Δ0 his3Δ1 ura3Δ0 lys2Δ0</i>                                                                            | this study |
| RLKY63 | <i>pat1Δ yox1Δ</i>                           | <i>MATa pat1Δ::natMX yox1Δ::kanMX can1Δ::STE2pr-his5 lyp1Δ::STE3pr-LEU2 leu2Δ0 his3Δ1 ura3Δ0 lys2Δ0</i>                                                               | this study |
| RLKY64 | <i>pat1Δ yhp1Δ</i>                           | <i>MATa pat1Δ::natMX yhp1Δ::kanMX can1Δ::STE2pr-his5 lyp1Δ::STE3pr-LEU2 leu2Δ0 his3Δ1 ura3Δ0 lys2Δ0</i>                                                               | this study |
| RLKY66 | <i>xrn1Δ</i>                                 | <i>MATα xrn1Δ::natMX can1Δ::STE2pr-his5 lyp1Δ::STE3pr-LEU2 leu2Δ0 his3Δ1 ura3Δ0</i>                                                                                   | C. Boone   |
| RLKY81 | <i>xrn1Δ yox1Δ</i>                           | <i>MATα xrn1Δ::natMX yox1Δ::kanMX can1Δ::STE2pr-his5 lyp1Δ::STE3pr-LEU2 leu2Δ0 his3Δ1 ura3Δ0 lys2Δ0</i>                                                               | this study |
| RLKY82 | <i>xrn1Δ yhp1Δ</i>                           | <i>MATα xrn1Δ::natMX yhp1Δ::kanMX can1Δ::STE2pr-his5 lyp1Δ::STE3pr-LEU2 leu2Δ0 his3Δ1 ura3Δ0 lys2Δ0</i>                                                               | this study |
| RLK43  | YOX1-MS2<br><i>Lsm1-mCherry</i>              | <i>MATa /MATα YOX1-MS2/YOX1 LSM1/LSM1-mCherry-natMX pMS2-CP-GFP(x3) leu2Δ0/leu2Δ0 his3Δ1/his3Δ1 ura3Δ0/ura3Δ0 lys2Δ0/LYS2 met15Δ0/MET15</i>                           | this study |
| RLK45  | YOX1-MS2<br><i>Pat1-mCherry</i>              | <i>MATa /MATα YOX1-MS2/YOX1 PAT1/PAT1-mCherry-natMX pMS2-CP-GFP(x3) leu2Δ0/leu2Δ0 his3Δ1/his3Δ1 ura3Δ0/ura3Δ0 lys2Δ0/LYS2 met15Δ0/MET15</i>                           | this study |
| RLKY72 | <i>xrn1Δ</i> YOX1-MS2<br><i>Lsm1-mCherry</i> | <i>MATa /MATα xrn1Δ::kanMX/xrn1Δ::kanMX YOX1-MS2/YOX1 LSM1/LSM1-mCherry-natMX pMS2-CP-GFP(x3) leu2Δ0/leu2Δ0 his3Δ1/his3Δ1 ura3Δ0/ura3Δ0 lys2Δ0/LYS2 met15Δ0/MET15</i> | this study |
| RLKY71 | <i>xrn1Δ</i> YOX1-MS2<br><i>Pat1-mCherry</i> | <i>MATa /MATα xrn1Δ::kanMX/xrn1Δ::kanMX YOX1-MS2/YOX1 PAT1/PAT1-mCherry-natMX pMS2-CP-GFP(x3) leu2Δ0/leu2Δ0 his3Δ1/his3Δ1 ura3Δ0/ura3Δ0 lys2Δ0/LYS2 met15Δ0/MET15</i> | this study |
| RLKY74 | YOX1 <i>Lsm1-mCherry</i>                     | <i>MATa /MATα YOX1/YOX1 LSM1/LSM1-mCherry-natMX pMS2-CP-GFP(x3) leu2Δ0/leu2Δ0 his3Δ1/his3Δ1 ura3Δ0/ura3Δ0 lys2Δ0/LYS2 met15Δ0/MET15</i>                               | this study |



|         |                                                                                                                                                                                                                                                                                   |                                                                                                                                                                                            |            |
|---------|-----------------------------------------------------------------------------------------------------------------------------------------------------------------------------------------------------------------------------------------------------------------------------------|--------------------------------------------------------------------------------------------------------------------------------------------------------------------------------------------|------------|
| RLKY75  | YOX1 Pat1-mCherry                                                                                                                                                                                                                                                                 | <i>MATa</i> / <i>MATα</i> <i>YOX1/YOX1 PAT1/PAT1-mCherry-natMX pMS2-CP-GFP(x3)</i><br><i>leu2Δ0/leu2Δ0 his3Δ1/his3Δ1 ura3Δ0/ura3Δ0 lys2Δ0/LYS2 met15Δ0/MET15</i>                           | this study |
| RLKY76  | <i>xrn1Δ</i> YOX1<br>Lsm1-mCherry                                                                                                                                                                                                                                                 | <i>MATa</i> / <i>MATα</i> <i>xrn1Δ::kanMX/xrn1Δ::kanMX YOX1/YOX1 LSM1/LSM1-mCherry-natMX pMS2-CP-GFP(x3)</i><br><i>leu2Δ0/leu2Δ0 his3Δ1/his3Δ1 ura3Δ0/ura3Δ0 lys2Δ0/LYS2 met15Δ0/MET15</i> | this study |
| RLKY77  | <i>xrn1Δ</i> YOX1<br>Pat1-mCherry                                                                                                                                                                                                                                                 | <i>MATa</i> / <i>MATα</i> <i>xrn1Δ::kanMX/xrn1Δ::kanMX YOX1/YOX1 PAT1/PAT1-mCherry-natMX pMS2-CP-GFP(x3)</i><br><i>leu2Δ0/leu2Δ0 his3Δ1/his3Δ1 ura3Δ0/ura3Δ0 lys2Δ0/LYS2 met15Δ0/MET15</i> | this study |
| RLKY80  | HTA2-mCherry                                                                                                                                                                                                                                                                      | <i>MATα</i> HTA2-mCherry-hphMX <i>can1Δ::STE2pr-LEU2 lyp1Δ leu2Δ0 his3Δ1 ura3Δ0</i>                                                                                                        | this study |
| RLKY86  | YOX1-GFP<br>HTA2-mCherry                                                                                                                                                                                                                                                          | <i>MATa</i> HTA2-mCherry-hphMX YOX1-GFP- GFP-HIS3MX<br><i>can1Δ::STE2pr-LEU2 lyp1Δ leu2Δ0 his3Δ1 ura3Δ0</i>                                                                                | this study |
| RLKY87  | <i>lsm1Δ</i> YOX1-GFP<br>HTA2-mCherry                                                                                                                                                                                                                                             | <i>MATa</i> <i>lsm1Δ::kanMX</i> HTA2-mCherry-hphMX YOX1-GFP- GFP-HIS3MX<br><i>can1Δ::STE2pr-LEU2 lyp1Δ leu2Δ0 his3Δ1 ura3Δ0</i>                                                            | this study |
| NTY13   | RPL39pr-tdTomato                                                                                                                                                                                                                                                                  | <i>MATα</i> <i>can1Δ::RPL39pr-tdTomato-CaURA3::STE2pr-LEU2 lyp1Δ leu2Δ0 his3Δ1 ura3Δ0</i>                                                                                                  | 4          |
| RLKY83  | YOX1-GFP<br>RPL39pr-tdTomato                                                                                                                                                                                                                                                      | <i>MATa</i> YOX1-GFP-HIS3MX <i>can1Δ::RPL39pr-tdTomato-CaURA3::STE2pr-LEU2 lyp1Δ leu2Δ0 his3Δ1 ura3Δ0</i>                                                                                  | this study |
| RLKY84  | <i>lsm1Δ</i> YOX1-GFP<br>RPL39pr-tdTomato                                                                                                                                                                                                                                         | <i>MATa</i> <i>lsm1Δ::kanMX</i> YOX1-GFP-HIS3MX <i>can1Δ::RPL39pr-tdTomato-CaURA3::STE2pr-LEU2 lyp1Δ leu2Δ0 his3Δ1 ura3Δ0</i>                                                              | this study |
| RLKY104 | <i>pry3Δ</i> (query)                                                                                                                                                                                                                                                              | <i>MATα</i> <i>pry3Δ::natMX can1Δ::STE2pr-his5 lyp1Δ leu2Δ0 his3Δ1 ura3Δ0 met15Δ0</i>                                                                                                      | C. Boone   |
| RLKY105 | <i>ald6Δ</i> (query)                                                                                                                                                                                                                                                              | <i>MATα</i> <i>ald6Δ::natMX can1Δ::STE2pr-his5 lyp1Δ leu2Δ0 his3Δ1 ura3Δ0 met15Δ0</i>                                                                                                      | C. Boone   |
| RLKY106 | <i>rad54Δ</i> (query)                                                                                                                                                                                                                                                             | <i>MATα</i> <i>rad54Δ::natMX can1Δ::STE2pr-his5 lyp1Δ leu2Δ0 his3Δ1 ura3Δ0 met15Δ0</i>                                                                                                     | C. Boone   |
| RLKY107 | <i>yml131WΔ</i> (query)                                                                                                                                                                                                                                                           | <i>MATα</i> <i>yml131wΔ::natMX can1Δ::STE2pr-his5 lyp1Δ leu2Δ0 his3Δ1 ura3Δ0 met15Δ0</i>                                                                                                   | C. Boone   |
| RLKY108 | <i>mnr1Δ</i> (query)                                                                                                                                                                                                                                                              | <i>MATα</i> <i>mnr1Δ::natMX can1Δ::STE2pr-his5 lyp1Δ leu2Δ0 his3Δ1 ura3Δ0 met15Δ0</i>                                                                                                      | C. Boone   |
| RLK109  | <i>ura3Δ</i> (query)                                                                                                                                                                                                                                                              | <i>MATα</i> <i>ura3Δ::natMX can1Δ::STE2pr-his5 lyp1Δ leu2Δ0 his3Δ1 ura3Δ0 met15Δ0</i>                                                                                                      | C. Boone   |
| RLKY110 | <i>ald6Δ</i>                                                                                                                                                                                                                                                                      | <i>MATa</i> <i>ald6Δ::kanMX leu2Δ0 his3Δ1 ura3Δ0 met15Δ0</i>                                                                                                                               | 3          |
| RLKY111 | YOX1-FLAG                                                                                                                                                                                                                                                                         | <i>MATa</i> YOX1-FLAG-KanMX <i>leu2Δ0 his3Δ1 ura3Δ0 met15Δ0</i>                                                                                                                            | this study |
| RLKY112 | <i>lsm1Δ</i> YOX1-FLAG                                                                                                                                                                                                                                                            | <i>MATa</i> <i>lsm1Δ::URA3MX</i> YOX1-FLAG-KanMX <i>leu2Δ0 his3Δ1 ura3Δ0 met15Δ0</i>                                                                                                       | this study |
|         | <b>All strains in Figure 2 have the following genotypes:</b><br><i>MATa</i> <i>lsm1Δ::natMX xxxΔ::kanMX can1Δ::STE2pr-his5 lyp1Δ leu2Δ0 his3Δ1 ura3Δ0 lys2Δ0</i><br><i>MATa</i> <i>pat1Δ::natMX xxxΔ::kanMX can1Δ::STE2pr-his5 lyp1Δ::STE3pr-LEU2 leu2Δ0 his3Δ1 ura3Δ0 lys2Δ0</i> |                                                                                                                                                                                            | this study |

|  |                                                                                                                                                                                                                                       |            |
|--|---------------------------------------------------------------------------------------------------------------------------------------------------------------------------------------------------------------------------------------|------------|
|  | <p><b>All strains in Figure 6 have the following genotypes:</b><br/> <i>MATa xxxΔ::kanMX yyyΔ::natMX leu2Δ0 his3Δ1 ura3Δ0 lyp1Δ0 can1Δ0::STE2pr-SpHIS5</i></p>                                                                        | this study |
|  | <p><b>All strains in Figure 7a-b have the following genotypes:</b><br/> <i>MATa lsm1Δ::kanMX leu2Δ0 his3Δ1 ura3Δ0 met15Δ0 pBY011[GAL1-10pr-]</i><br/> <i>MATa lsm1Δ::kanMX leu2Δ0 his3Δ1 ura3Δ0 met15Δ0 pBY011[GAL1-10pr-XXX]</i></p> | this study |
|  | <p><b>All strains in Figure 7f-g have the following genotypes:</b><br/> <i>MATa xxxΔ::NatMX RNR3-GFP-HIS3MX can1pr::RPL39pr-tdTomato-CaURA3</i><br/> <i>can1Δ::STE2pr-LEU2 leu2Δ0 his3Δ1 ura3Δ0 met15Δ0 lyp1Δ0</i></p>                | this study |

## References

1. Brachmann, C. B. *et al.* Designer deletion strains derived from *Saccharomyces cerevisiae* S288C: a useful set of strains and plasmids for PCR-mediated gene disruption and other applications. *Yeast* **14**, 115–32 (1998).
2. Tkach, J. M. *et al.* Dissecting DNA damage response pathways by analysing protein localization and abundance changes during DNA replication stress. *Nat. Cell Biol.* **14**, 966–76 (2012).
3. Giaever, G. *et al.* Functional profiling of the *Saccharomyces cerevisiae* genome. *Nature* **418**, 387–391 (2002).
4. Hendry, J. A., Tan, G., Ou, J., Boone, C. & Brown, G. W. Leveraging DNA damage response signaling to identify yeast genes controlling genome stability. *G3 (Bethesda)*. **5**, 997–1006 (2015).
